# Supplementary material for: Interpretable brain age prediction using linear latent variable models of functional connectivity
Source: PubMed Central journal article supplement (PMC7286502; doi:10.1371/journal.pone.0232296), 2020-06-10
Supplement: pone.0232296.s001.pdf [file pone.0232296.s001.pdf]

**S1 Appendix. Technical details of the MHA algorithm.** In this appendix, we give further details of the block-coordinate descent algorithm which we implement to update the model parameters. In practice, we solve the constrained optimisation (8) via the use of projections onto the non-negative quadrant (non-negativity) and Lagrange multipliers. More specifically, we use the objective function:

$$\tilde{\mathcal{L}} = \mathcal{L} + \frac{\delta}{2} \|W^T W - I_k\|_2^2 + \text{tr}(\Gamma^T (W^T W - I_k)), \quad (16)$$

where  $\Gamma \in \mathbb{R}^{k \times k}$  and  $\delta$  are Lagrange multipliers enforcing the orthonormality constraints.

We employ gradient descent approach to update the estimate of  $W$ . To this end, we follow Monti and Hyvärinen [29] and introduce a gradient step size  $\eta$  and project onto the non-negative orthant at each iteration (this ensures that the positivity constraint is maintained). The update takes the form

$$W \leftarrow \mathcal{P}^+ \left( W - \eta \left( \frac{\partial \mathcal{L}}{\partial W} + \delta(WW^T W - W) + W\Gamma \right) \right), \quad (17)$$

where  $\mathcal{P}^+ = \max(0, x)$  denotes the projection onto the non-negative orthant and  $\eta$  is a stepsize parameter. The update for the Lagrange multipliers  $\Gamma$  is given by:

$$\Gamma \leftarrow \Gamma + \delta(W^T W - I).$$

In the case of the loading matrix, the gradient update is defined as:

$$\begin{aligned} \frac{\partial \mathcal{L}}{\partial W} &= \sum_{i=1}^N \frac{\partial \mathcal{L}}{\partial \Sigma^{(i)}} \frac{\partial \Sigma^{(i)}}{\partial W} \\ &= \sum_{i=1}^N \left( -\Sigma^{(i)-1} + \Sigma^{(i)-1} S^{(i)} \Sigma^{(i)-1} \right) W G^{(i)}, \end{aligned} \quad (18)$$

where we note that via the Sherman-Woodbury identity and using the form of the covariance (3), we can write  $\Sigma^{(i)-1}$  as follows:

$$\Sigma^{(i)-1} = (v^{(i)} I)^{-1} - (v^{(i)} I)^{-1} W (G^{(i)-1} + W^T v^{(i)} I W)^{-1} W^T (v^{(i)} I)^{-1}. \quad (19)$$

For the diagonal matrix of eigenvalues,  $G^{(i)}$ , we can update each matrix independently as follows:

$$\begin{aligned} \frac{\partial \mathcal{L}}{\partial G^{(i)}} &= \frac{\partial \mathcal{L}}{\partial \Sigma^{(i)}} \frac{\partial \Sigma^{(i)}}{\partial G^{(i)}} \\ &= \sum_{i=1}^N \left( -\Sigma^{(i)-1} + \Sigma^{(i)-1} K^{(i)} \Sigma^{(i)-1} \right). \end{aligned} \quad (20)$$
