# Supplementary material for: Interpretable brain age prediction using linear latent variable models of functional connectivity
Source: PubMed Central journal article supplement (PMC7286502; doi:10.1371/journal.pone.0232296), 2020-06-10
Supplement: pone.0232296.s002.pdf [file pone.0232296.s002.pdf]

**S2 Code. Python and R implementations of the MHA algorithm.**

- Python: <https://github.com/piomonti/MHA>
- R: [http://www.gatsby.ucl.ac.uk/~ricardom/FactorCovariance\\_ScoreMatch\\_PenalizeLagrange.R](http://www.gatsby.ucl.ac.uk/~ricardom/FactorCovariance_ScoreMatch_PenalizeLagrange.R)
