# Supplementary material for: Interpretable brain age prediction using linear latent variable models of functional connectivity
Source: PLoS One. 2020 Jun 10;15(6):e0232296. doi: 10.1371/journal.pone.0232296 (PMC7286502; doi:10.1371/journal.pone.0232296)
Supplement: S1 Table — In the case of the HCP datasets, 80 subjects were randomly selected out of all possible subjects. (PDF) [file pone.0232296.s003.pdf]

| Dataset | # subjects | Age range |
|---------|------------|-----------|
| CamCAN  | 647        | 18—88     |
| HCP     | 80         | 20—36     |
| ATR     | 191        | 20—70     |

**Table 1.** Table detailing number of subjects studied in each of the three datasets considered. In the case of the HCP datasets, 80 subjects were randomly selected out of all possible subjects.
